# Supplementary material
Source: Research Square preprint supplement (doi:10.21203/rs.3.rs-9369869/v1)
Supplement: Supplementary file 1 [file 93e357d727d9b3b5562734fd.docx]

**Tables**

**Table 1. Larval food quantity (mg) per day and per individual for the five nutritional treatments.** Food was adjusted by individual number and larval stage. ADL corresponds to the standard food concentration used to maintain mosquito colonies in our laboratory.

| **Larva stage** | **% ADL** | | | | |
| --- | --- | --- | --- | --- | --- |
| **100** | **50** | **25** | **10** | **5** |
| L1/L2 | 0.2 | 0.1 | 0.05 | 0.02 | 0.01 |
| L2/L3 | 0.4 | 0.2 | 0.1 | 0.04 | 0.02 |
| L3/L4 | 1 | 0.5 | 0.25 | 0.1 | 0.05 |

**Table 2. Impact of larval nutritional treatments on mosquito life-history traits.** Sex ratio is defined as the proportion of females among total adults. Different superscript letters indicate significant differences among treatments based on pairwise comparisons of estimated marginal means from a binomial GLMM with Bonferroni-adjusted p-values (p < 0.05). CI: 95% confidence intervals.

| **Variable** | **100% ADL** | **50% ADL** | **25% ADL** | **10% ADL** | **5% ADL** |
| --- | --- | --- | --- | --- | --- |
| Larval survival (%) | 85.7  [81.0–89.3]ᵃ | 82.9  [77.9–87.0]ᵃ | 83.2  [78.2–87.2]ᵃ | 64.3  [57.8–70.4]ᵇ | 18.9  [14.6–24.1]ᶜ |
| Sex ratio | 0.43  [0.38–0.48]ᵃᵇ | 0.44  [0.39–0.49]ᵃᵇ | 0.52  [0.46–0.57]ᵃ | 0.41  [0.35–0.47]ᵃᵇ | 0.29  [0.20–0.40]ᵇ |

**Table 3. Impact of larval nutritional treatments on mosquito wing morphology.** FA, Fluctuating asymmetry. Asterisks denote significant F–M differences, p < 0.05. Different superscript letters indicate significant differences among treatments based on permutation-based pairwise comparisons (10,000 permutations). Treatments sharing the same letter are not significantly different.

| **Variable** | **100% ADL** | **50% ADL** | **25% ADL** | **10% ADL** | **5% ADL** |
| --- | --- | --- | --- | --- | --- |
| *Size and Shape* |  |  |  |  |  |
| Sexual Size Dimorphism (SSD) | 0.28* | 0.33* | 0.32* | 0.21 | 0.17 |
| Sexual shape dimorphism (SShD) | 10.98* | 11.01* | 11.63* | 11.56* | 11.76* |
| Metric Disparity F | 0.00052ᵃ | 0.00053ᵃ | 0.00059ᵃᵇ | 0.00057ᵃ | 0.00074ᵇ |
| M | 0.00058ᵃ | 0.00062ᵃ | 0.00063ᵃ | 0.00068ᵃ | 0.00060ᵃ |
| *Symmetry* |  |  |  |  |  |
| FA size (mean ± SD)              F | 0.022 ± 0.013ᵃ | 0.022 ± 0.015ᵃ | 0.019 ± 0.017ᵃ | 0.021 ± 0.016ᵃ | 0.018 ± 0.013ᵃ |
| M | 0.015 ± 0.012ᵃ | 0.017 ± 0.012ᵃ | 0.014 ± 0.008ᵃ | 0.016 ± 0.014ᵃ | 0.012 ± 0.013ᵃ |
| FA shape (mean ± SD)           F | 0.015 ± 0.003ᵃ | 0.014 ± 0.003ᵃ | 0.013 ± 0.004ᵃ | 0.016 ± 0.004ᵃᵇ | 0.019 ± 0.007ᵇ |
| M | 0.015 ± 0.004ᵃ | 0.014 ± 0.003ᵃ | 0.012 ± 0.002ᵃ | 0.014 ± 0.004ᵃ | 0.013 ± 0.003ᵃ |

**Table 4.** **Estimated nutritional stress thresholds for females and males based on segmented regression analyses.** Thresholds indicate the percentage of *ad libitum* (ADL) food concentration at which a significant change in slope was detected. Only traits that responded significantly to larval nutritional treatments are included.

| **Trait** | **Sex** | **Threshold** | **95% CI** | **Davies test**  **(*p-value*)** |
| --- | --- | --- | --- | --- |
| Larval development time | F | 33.44 | [31.80–35.07] | <0.001 |
|  | M | 38.66 | [36.30–41.01] | <0.001 |
| Wing centroid size (CS) | F | 34.21 | [30.32–38.11] | <0.001 |
|  | M | 38.95 | [30.20–47.70] | 0.03 |
| Wing shape (PC1) | F | 32.95 | [18.15–47.74] | 0.03 |
|  | M | 49.99 | [6.19–93.81] | 0.026 |
| FA shape | F | 16.88 | [5.83–27.93] | <0.001 |
