# Supplementary material
Source: Research Square preprint supplement (doi:10.21203/rs.3.rs-9369869/v1)
Supplement: Supplementary file 2 [file dfe354afc46ceabc8122f1c6.docx]

**Additional files**

**Fig. S1. Segmented regression analyses of trait responses along the larval nutritional gradient.** Distributions of (A) larval development time, (B) wing centroid size (CS), (C) wing shape (PC1), and (D) wing shape fluctuating asymmetry (FA) across the five larval nutritional treatments (100%, 50%, 25%, 10%, and 5% of *ad libitum*, ADL). Colors indicate sex, solid lines represent fitted segmented regression models, and dashed vertical lines indicate the estimated thresholds. Thresholds represent the estimated percentage of *ad libitum* (ADL) food concentration at which a significant change in slope was detected according to segmented regression (Davies test). The x-axis is presented from 100% to 5% ADL to illustrate increasing nutritional stress.

**Table S1.** **Description of statistical models used.** N, number of individuals included in each analysis. Asterisk (*) represents the interaction between two variables (i.e., survival = F * C, means survival = F + C + F x C. Square brackets indicate the error structure used (n = normal, b = binomial). Sex ratio is defined as the proportion of females relative to the total number of individuals. All morphometric models were evaluated using 10,000 random permutations to account for heteroscedasticity

| **Variable of interest** | **Resp. variable** | **N** | **Fixed effects** | **Random effects** | **Model type** |
| --- | --- | --- | --- | --- | --- |
| *Life-history traits* |  |  |  |  |  |
| Larval survival | alive or dead | 2000 | Nutritional_treatment | Tank | glmm [b] |
| Larval development time | log(days to adult emergence) | 1315 | Nutritional_treatment * Sex | Tank | lmer [n] |
| Sex ratio | female or male | 1315 | Nutritional_treatment |  | glm [b] |
|  |  |  |  |  |  |
| *Morphometrics* |  |  |  |  |  |
| Wing size | centroid size (CS) | 254 | Nutritional_treatment * Sex | - | lm [n] |
| Wing shape | Procrustes coordinates | 254 | Nutritional_treatment * Sex + log(CS) | - | Procrustes MANOVA |
| Allometric relationship | Procrustes coordinates | 254 | log(CS) | - | Multivariate regression |
| Procrustes ANOVA  (object symmetry) | Procrustes coordinates (right and left wing, two digitizations) | 218 | Individual + Side + Digitalization + (Individual x Side) | - | Procrustes MANOVA |
| FA size | Absolute difference in CS between sides (|ΔCS|) | 218 | Nutritional_treatment * Sex | - | lm [n] |
| FA shape | Individual × Side component of a Procrustes ANOVA (distance to symmetric consensus) | 218 | Nutritional_treatment * Sex | - | lm [n] |

**Table S2.** **Pairwise Mahalanobis distance among treatments by sex.** Distances amongthe five larval nutritional treatments for females (lower triangle) and males (upper triangle). Significance was assessed using 10,000 permutations with Bonferroni-corrected p-values. Asterisks indicate significant differences (p < 0.05).

|  | 100% ADL | 50% ADL | 25% ADL | 10% ADL | 5% ADL |
| --- | --- | --- | --- | --- | --- |
| 100% ADL | - | 2.25* | 2.84* | 3.95* | 4.37* |
| 50% ADL | 2.66* | - | 1.92 | 3.71* | 4.17* |
| 25% ADL | 3.16* | 2.30* | - | 2.66 | 3.31* |
| 10% ADL | 4.96* | 3.93* | 3.21* | - | 2.23 |
| 5% ADL | 4.92* | 4.12* | 3.42* | 2.55 | - |

**Table S3.** **Procrustes ANOVAS testing for differences in asymmetry in wing size and shape FA.** SS: Sum of Squares; MS: Mean Square; df: degrees of freedom.

| *Size: CS* |  |  |  |  |  |  |  |
| --- | --- | --- | --- | --- | --- | --- | --- |
| **Effect** | **SS** | **MS** | **df** | **F** | **p-value** |  |  |
| Individual | 411.481 | 1.905008 | 216 | 5180.22 | <.0001 |  |  |
| Side | 0.030 | 0.029510 | 1 | 80.25 | <.0001 |  |  |
| Individual * Side | 0.079 | 0.000368 | 216 | 10.84 | <.0001 |  |  |
| Error | 0.015 | 0.000034 | 434 |  |  |  |  |
|  | | | | | | | |
| *Shape: Procrustes coordinates* | | | | | | | |
| **Effect** | **SS** | **MS** | **df** | **F** | **p-value** | **Pillai tr.** | **p-value** |
| Individual | 1.778 | 0.0002287 | 7776 | 36.77 | <.0001 | 27.15 | <.0001 |
| Side | 0.002 | 0.0000551 | 36 | 8.86 | <.0001 | 0.55 | <.0001 |
| Individual * Side | 0.048 | 0.0000062 | 7776 | 4.16 | <.0001 | 23.28 | <.0001 |
| Error | 0.023 | 0.0000015 | 15624 |  |  |  |  |

**Additional file 5: Individual-level dataset of mosquito development, survival and life-history traits.** Raw individual-level data used in the analyses, including developmental time, survival status, sex, and life-history traits across larval nutritional treatments.

**Additional file 6:** **Coordinates of 20 digitized wing landmarks for female and male mosquitoes.** The dataset includes individual identifiers, treatment, wing side, and replicate digitization. Each wing was digitized twice to quantify measurement error.
